# Supplementary material for: A flexible optical gas pressure sensor as the signal readout for point-of-care immunoassay
Source: Royal Society of Chemistry journal article supplement (doi:10.1039/d2an01305c), 2022-01-01
Supplement: d2an01305c3.pdf [file d2an01305c3.pdf]

## Supporting Information

### **Flexible optical gas pressure sensor as the signal readout for point-of-care Immunoassay**

Kai He <sup>a, b, c</sup>, Shan Xing <sup>a, d, e</sup>, Yang Shen <sup>a, b, c \*</sup>, Chongjun Jin <sup>a, b, c \*</sup>

<sup>a</sup>. State Key Laboratory of Optoelectronic Materials and Technologies, Sun Yat-sen University, Guangzhou, 510275, China

<sup>b</sup>. Guangzhou Key Laboratory of Flexible Electronic Materials and Wearable Devices, Sun Yat-sen University Guang-zhou, 510275, China

<sup>c</sup>. School of Materials Science and Engineering, Sun Yat-sen University, Guangzhou 510275, China

<sup>d</sup>. Department of Clinical Laboratory, State Key Laboratory of Oncology in South China, Collaborative Innovation Center for Cancer Medicine, Sun Yat-sen University Cancer Center, Guangzhou 510060, China

<sup>e</sup>. School of Biomedical Engineering, Sun Yat-sen University, Guangzhou 510275, China

**\*Corresponding authors.** E-mail: ShenY33@mail.sysu.edu.cn, jinchjun@mail.sysu.edu.

## Supplementary figures

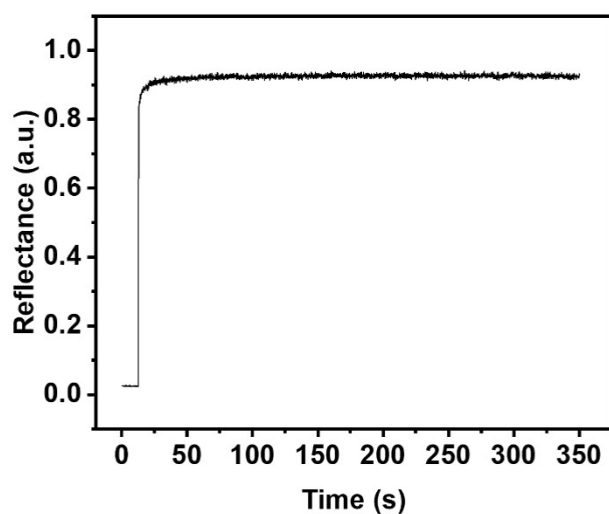

**Figure S1.** The gas tightness investigation of the Ag/PDMS BGPS (continuously recording the reflectance variation of the Ag/PDMS bilayer after inflating the gas chamber).

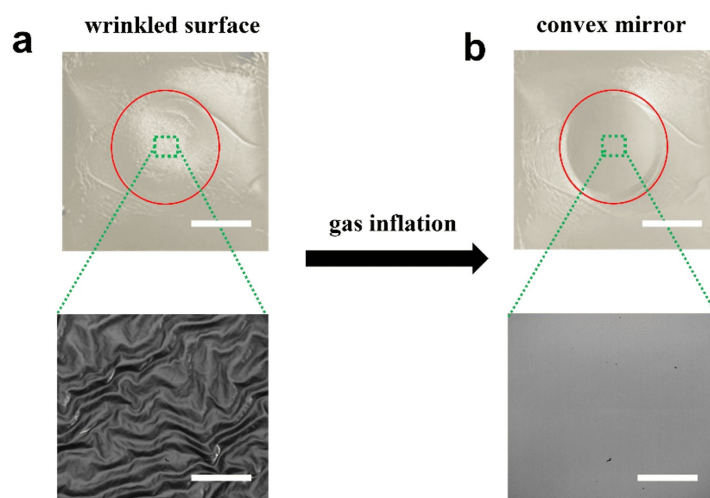

**Figure S2.** Photographs (top) and microscopic images (bottom) of the active area of an Ag/PDMS bilayer (a) under depressurization and (b) after gas inflation. The green dashed circle indicates the active area of an Ag/PDMS bilayer. Scale bar: (top) 5 mm, (bottom) 100  $\mu\text{m}$ .

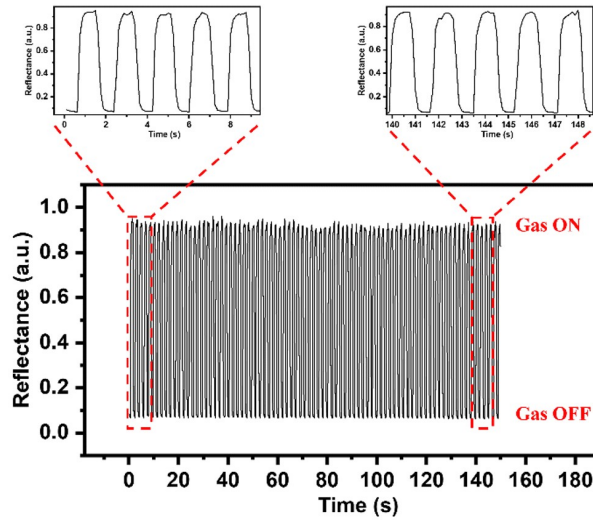

**Figure S3. Cycling stability investigation of an Ag/PDMS BGPS (under a square-waveform pressure switched between 0 and 200  $\mu\text{l}$ ,  $\lambda = 800 \text{ nm}$ ).**

## Supplementary Tables

**Table S1. Summary of the performance of the AFP immunosensors.**

| References                                                         | methods                    | linear range (ng/mL) | LOD (ng/mL) |
|--------------------------------------------------------------------|----------------------------|----------------------|-------------|
| Xu S, <i>Anal. Chim. Acta</i> , 2017, <b>983</b> , 173–180         | Fluorescent                | 0.5–60               | 0.16        |
| Li C, <i>ACS sensors</i> , 2019, <b>4</b> , 3034–3041              | Microcantilever            | 1–900                | 0.05        |
| Wu Y, <i>J. colloid. Interf. Sci.</i> , 2020, <b>580</b> , 583–591 | Photoelectric chemical     | 0.05–100             | 0.05        |
| Niu Y, <i>Biosens. Bioelectron.</i> , 2017, <b>92</b> , 1–7        | Electrochemical            | 0.1–120              | 0.055       |
| Lv S, <i>Anal. Chem.</i> , 2019, <b>91</b> , 12055–12062           | Electrochemical            | 0.1–50               | 0.04        |
| our work                                                           | Optical gas pressure-based | 0.05–132             | 0.016       |

## Supplementary movies

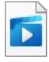

Movie. S1.mp4

**Movie S1. Real-time video of the optical photographs of Ag/PDMS BGPS during the gas-driven process under a square-waveform pressure switched between 0 and 200  $\mu\text{l}$ .**

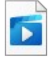

Moive. S2.mp4

**Movie S2. Real-time video of the microscopical image of Ag film wrinkling structure during the gas-driven process under a square-waveform pressure switched between 0 and 200  $\mu\text{l}$ .**
